# Supplementary material for: Owner-Reported Pica in Domestic Cats Enrolled onto a Birth Cohort Study
Source: MDPI journal article supplement (doi:10.3390/ani11041101), 2021-04-12
Supplement: s1 [file s1]

**Supplementary Materials**
**Table S1:** Questions regarding pica

In Questionnaires 2, 3 and 4, owners were asked:

| Please indicate which, if any, of these materials your cat currently chews and/or eats and which your cat used to chew and/or eat. |                                  |                          |                                           |                           |            |
|------------------------------------------------------------------------------------------------------------------------------------|----------------------------------|--------------------------|-------------------------------------------|---------------------------|------------|
|                                                                                                                                    | Currently chews but does not eat | Currently chews and eats | Used to chew or eat but no longer does so | Has never chewed or eaten | Don't know |
| Woollen fabrics                                                                                                                    |                                  |                          |                                           |                           |            |
| Other fabrics                                                                                                                      |                                  |                          |                                           |                           |            |
| Plastics                                                                                                                           |                                  |                          |                                           |                           |            |
| Other Materials                                                                                                                    |                                  |                          |                                           |                           |            |

**Table S2:** Univariable logistic regression analysis of potential variables for owner-reported chronic pica.

| Variable                                                                                   | Categories                                                                      | Controls n (%) | Cases n (%) | OR (95% CI)       | P-Value |
|--------------------------------------------------------------------------------------------|---------------------------------------------------------------------------------|----------------|-------------|-------------------|---------|
| <b>Sex</b>                                                                                 | Female                                                                          | 123 (82.0)     | 27 (18.0)   | 1.00              |         |
|                                                                                            | Male                                                                            | 100 (74.6)     | 34 (25.4)   | 1.55 (0.88-2.74)  | 0.132   |
| <b>Breed</b>                                                                               | Domestic shorthairs, domestic longhairs, and their crossbreeds                  | 162 (79.8)     | 41 (20.2)   | 1.00              |         |
|                                                                                            | Purebreds                                                                       | 59 (74.7)      | 20 (25.3)   | 1.34 (0.73-2.47)  | 0.349   |
| <b>Acquisition age</b>                                                                     | <10 weeks                                                                       | 126 (77.3)     | 37 (22.7)   | 1.00              | 0.074   |
|                                                                                            | ≥10 weeks                                                                       | 66 (74.2)      | 23 (25.8)   | 1.19 (0.65-2.16)  | 0.576   |
|                                                                                            | Since birth                                                                     | 31 (96.9)      | 1 (3.1)     | 0.11 (0.02-0.83)  | 0.033   |
| <b>Source of cat</b>                                                                       | Accidentally or deliberately bred from an existing cat in the owners' household | 25 (89.3)      | 3 (10.7)    | 1.00              | 0.205   |
|                                                                                            | From a pedigree breeder                                                         | 45 (70.3)      | 19 (29.7)   | 3.52 (0.95-13.07) | 0.060   |
|                                                                                            | Rescue shelter/charity                                                          | 79 (76.7)      | 24 (23.3)   | 2.53 (0.70-9.12)  | 0.155   |
|                                                                                            | Stray/Feral/Found kittens/Kitten turned up at house                             | 51 (82.3)      | 11 (17.7)   | 1.80 (0.46-7.03)  | 0.399   |
|                                                                                            | All other sources                                                               | 20 (87.0)      | 3 (13.0)    | 1.25 (0.23-6.88)  | 0.798   |
| <b>Neuter status</b>                                                                       | Neutered prior to Q4 <sup>c</sup>                                               | 205 (77.7)     | 59 (22.3)   | 1.00              |         |
|                                                                                            | Not neutered by Q4                                                              | 18 (90.0)      | 2 (10.0)    | 0.39 (0.09-1.71)  | 0.210   |
| <b>Indoor/outdoor access Reported in Q2 <sup>a</sup></b>                                   | Inside only – not allowed out                                                   | 68 (69.1)      | 30 (30.9)   | 1.00              |         |
|                                                                                            | Access to outdoors                                                              | 153 (83.2)     | 31 (16.8)   | 0.46 (0.26-0.82)  | 0.008   |
| <b>Reported in Q3 <sup>b</sup></b>                                                         | Inside only or restricted outdoor access via an enclosed run or on a lead       | 97 (82.2)      | 21 (17.8)   | 1.00              |         |
|                                                                                            | Access to outdoors                                                              | 100 (73.5)     | 36 (26.5)   | 1.66 (0.91-3.05)  | 0.100   |
| <b>Frequency with which household members played with the cat per week. Reported in Q2</b> | Most days                                                                       | 202 (77.1)     | 60 (22.9)   | 1.00              |         |
|                                                                                            | Quite often/Not very often/Never                                                | 20 (95.2)      | 1 (4.8)     | 0.17 (0.02-1.28)  | 0.085   |
| <b>Reported in Q3</b>                                                                      | Most days                                                                       | 157 (73.0)     | 58 (27.0)   | 1.00              |         |
|                                                                                            | Quite often/Not very often/Never                                                | 64 (95.5)      | 3 (4.5)     | 0.13 (0.04-0.42)  | 0.001   |

|                                                                                     |                                           |            |           |                  |       |
|-------------------------------------------------------------------------------------|-------------------------------------------|------------|-----------|------------------|-------|
| <i>Reported in Q2 and Q3 *</i>                                                      | Consistently most days                    | 149 (72.3) | 57 (27.7) | 1.00             | 0.002 |
|                                                                                     | Consistently quite often/not very often   | 11 (91.7)  | 1 (8.3)   | 0.24 (0.03-1.88) | 0.174 |
|                                                                                     | Change in frequency over time             | 60 (95.2)  | 3 (4.8)   | 0.13 (0.04-0.43) | 0.001 |
| <b>Ill or injured. Reported in Q1 – may or may not have required visit to a vet</b> | No                                        | 178 (79.1) | 47 (20.9) | 1.00             |       |
|                                                                                     | Yes                                       | 42 (77.8)  | 12 (22.2) | 1.08 (0.53-2.22) | 0.829 |
| <b>Ill or injured. Reported in Q2 – required a visit to a vet</b>                   | No                                        | 199 (79.9) | 50 (20.1) | 1.00             |       |
|                                                                                     | Yes                                       | 24 (68.6)  | 11 (31.4) | 1.82 (0.84-3.97) | 0.130 |
| <b>Owner's opinion on cat's appetite. Reported in Q2</b>                            | Very good                                 | 188 (79.0) | 50 (21.0) | 1.00             |       |
|                                                                                     | Fairly good/not very good/not at all good | 31 (75.6)  | 10 (24.4) | 1.21 (0.56-2.64) | 0.627 |
| <i>Reported in Q3</i>                                                               | Very good                                 | 153 (75.7) | 49 (24.3) | 1.00             |       |
|                                                                                     | Fairly good/not very good/not at all good | 63 (84.0)  | 12 (16.0) | 0.60 (0.30-1.19) | 0.143 |
| <i>Reported in Q2 and Q3</i>                                                        | Consistently very good                    | 142 (76.3) | 44 (23.7) | 1.00             | 0.484 |
|                                                                                     | Consistently fairly good/not very good    | 19 (76.0)  | 6 (24.0)  | 1.02 (0.38-2.71) | 0.970 |
|                                                                                     | Change in appetite reported               | 51 (83.6)  | 10 (16.4) | 0.63 (0.30-1.35) | 0.236 |
| <b>Cat receives food treats Reported in Q1</b>                                      | Yes                                       | 143 (76.1) | 45 (23.9) | 1.00             |       |
|                                                                                     | Never                                     | 78 (83.9)  | 15 (16.1) | 0.61 (0.32-1.17) | 0.135 |
| <i>Reported in Q2</i>                                                               | Yes                                       | 166 (76.5) | 51 (23.5) | 1.00             |       |
|                                                                                     | Never                                     | 55 (84.6)  | 10 (15.4) | 0.59 (0.28-1.24) | 0.167 |
| <i>Reported in Q3</i>                                                               | Yes                                       | 169 (76.1) | 53 (23.9) | 1.00             |       |
|                                                                                     | Never                                     | 50 (86.2)  | 8 (13.8)  | 0.51 (0.23-1.14) | 0.102 |
| <i>Reported in Q1 and Q2 *</i>                                                      | Consistently yes                          | 124 (76.5) | 38 (23.5) | 1.00             | 0.060 |
|                                                                                     | Consistently never                        | 36 (94.7)  | 2 (5.3)   | 0.18 (0.04-0.79) | 0.023 |
|                                                                                     | Change                                    | 59 (74.7)  | 20 (25.3) | 1.11 (0.59-2.06) | 0.751 |
| <i>Reported in Q2 and Q3</i>                                                        | Consistently yes                          | 150 (75.4) | 49 (24.6) | 1.00             | 0.223 |
|                                                                                     | Consistently never                        | 38 (86.4)  | 6 (13.6)  | 0.48 (0.19-1.21) | 0.121 |
|                                                                                     | Change                                    | 29 (82.9)  | 6 (17.1)  | 0.63 (0.25-1.62) | 0.339 |
| <i>Reported in Q1, Q2 and Q3 *</i>                                                  | Consistently yes                          | 111 (75.0) | 37 (25.0) | 1.00             | 0.109 |
|                                                                                     | Consistently never                        | 26 (96.3)  | 1 (3.7)   | 0.12 (0.02-0.88) | 0.037 |
|                                                                                     | Change                                    | 78 (78.0)  | 22 (22.0) | 0.85 (0.46-1.55) | 0.586 |
| <b>Single or multi-cat household. Reported in Q1</b>                                | Single cat household                      | 36 (67.9)  | 17 (32.1) | 1.00             |       |
|                                                                                     | Multi-cat household                       | 186 (81.6) | 42 (18.4) | 0.48 (0.25-0.93) | 0.030 |
| <i>Reported in Q2 *</i>                                                             | Single cat household                      | 31 (66.0)  | 16 (34.0) | 1.00             |       |
|                                                                                     | Multi-cat household                       | 190 (81.2) | 44 (18.8) | 0.45 (0.23-0.90) | 0.022 |
| <i>Reported in Q3 *</i>                                                             | Single cat household                      | 27 (64.3)  | 15 (35.7) | 1.00             |       |
|                                                                                     | Multi-cat household                       | 194 (81.2) | 45 (18.8) | 0.42 (0.21-0.85) | 0.016 |
| <i>Reported in Q1 and Q2 *</i>                                                      | Consistently a single cat household       | 29 (65.9)  | 15 (34.1) | 1.00             | 0.069 |
|                                                                                     | Consistently a multi-cat household        | 183 (81.7) | 41 (18.3) | 0.43 (0.21-0.88) | 0.021 |
|                                                                                     | Change in the number of cats              | 8 (80.0)   | 2 (20.0)  | 0.48 (0.09-2.57) | 0.394 |
| <i>Reported in Q2 and Q3</i>                                                        | Consistently a single cat household       | 27 (64.3)  | 15 (35.7) | 1.00             | 0.054 |

|                                                         |                                                                |            |           |                   |       |
|---------------------------------------------------------|----------------------------------------------------------------|------------|-----------|-------------------|-------|
|                                                         | Consistently a multi-cat household                             | 190 (81.2) | 44 (18.8) | 0.42 (0.21-0.85)  | 0.016 |
|                                                         | Change in the number of cats                                   | 4 (80.0)   | 1 (20.0)  | 0.45 (0.05-4.40)  | 0.493 |
| <i>Reported in Q1, Q2 and Q3 *</i>                      | Consistently a single cat household                            | 27 (65.9)  | 14 (34.1) | 1.00              | 0.077 |
|                                                         | Consistently a multi-cat household                             | 183 (81.7) | 41 (18.3) | 0.43 (0.21-0.90)  | 0.024 |
|                                                         | Change in the number of cats                                   | 10 (76.9)  | 3 (23.1)  | 0.58 (0.14-2.45)  | 0.457 |
|                                                         |                                                                |            |           |                   |       |
| <b>Presence of a dog(s) in household Reported in Q1</b> | No                                                             | 154 (74.4) | 53 (25.6) | 1.00              |       |
|                                                         | Yes                                                            | 61 (89.7)  | 7 (10.3)  | 0.33 (0.14-0.77)  | 0.011 |
| <b>Number of adults in household Reported in Q1</b>     | 1 or 2 adults                                                  | 156 (76.5) | 48 (23.5) | 1.00              |       |
|                                                         | 3 or more adults                                               | 57 (89.1)  | 7 (10.9)  | 0.40 (0.17-0.93)  | 0.034 |
| <b>Presence of children in household Reported in Q1</b> | No                                                             | 162 (6.1)  | 51 (23.9) | 1.00              |       |
|                                                         | Yes                                                            | 58 (87.9)  | 8 (12.1)  | 0.44 (0.20-0.98)  | 0.044 |
| <b>Housing tenure Reported in Q1</b>                    | Own (with or without mortgage)                                 | 161 (83.0) | 33 (17.0) | 1.00              |       |
|                                                         | Rent home, or house comes with employment                      | 61 (69.3)  | 27 (30.7) | 2.16 (1.20-3.89)  | 0.010 |
| <b>Moved to a new house Reported in Q2</b>              | No                                                             | 212 (79.1) | 56 (20.9) | 1.00              |       |
|                                                         | Yes                                                            | 11 (68.8)  | 5 (31.3)  | 1.72 (0.57-5.16)  | 0.332 |
| <b>Reported in Q3</b>                                   | No                                                             | 207 (79.9) | 52 (20.1) | 1.00              |       |
|                                                         | Yes                                                            | 9 (52.9)   | 8 (47.1)  | 3.54 (1.30-9.62)  | 0.013 |
| <b>Reported in Q2 and Q3</b>                            | No                                                             | 196 (80.3) | 48 (19.7) | 1.00              |       |
|                                                         | Yes                                                            | 20 (62.5)  | 12 (37.5) | 2.45 (1.12-5.36)  | 0.025 |
| <b>Annual household income Reported in Q1</b>           | <£15,000                                                       | 42 (82.4)  | 9 (17.6)  | 1.00              |       |
|                                                         | ≥£15,000                                                       | 164 (78.1) | 46 (21.9) | 1.31 (0.59-2.89)  | 0.505 |
| <b>Highest level of education Reported in Q1</b>        | No qualifications/GCSEs/O' levels                              | 35 (89.7)  | 4 (10.3)  | 1.00              | 0.048 |
|                                                         | A Levels                                                       | 28 (66.7)  | 14 (33.3) | 4.38 (1.30-14.78) | 0.017 |
|                                                         | HND or degree/Post-graduate degree/Professional qualifications | 150 (78.9) | 40 (21.1) | 2.33 (0.78-6.95)  | 0.128 |

<sup>a</sup> Questionnaire 2 was completed when cats were aged 6.5-7 months. <sup>b</sup> Questionnaire 3 was completed for cats aged 12.5-13 months. <sup>c</sup> Questionnaire 4 was completed when cats were aged 18.5-19 months. \* Variables that were excluded from the multivariable model building process due to have missing data for more than 150 cats.
